# Supplementary material for: EGFL7 drives the evolution of resistance to EGFR inhibitors in lung cancer by activating NOTCH signaling
Source: PubMed Central journal article supplement (PMC9617940; doi:10.1038/s41419-022-05354-y), 2022-10-29

Figure 4E

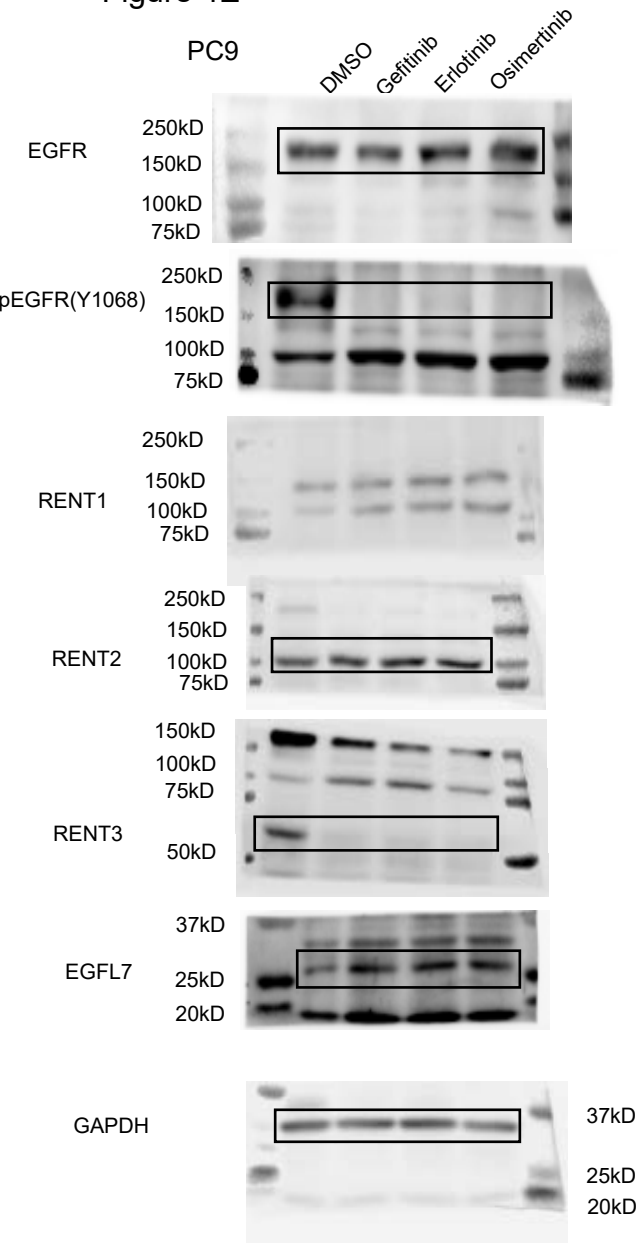

Figure 4F

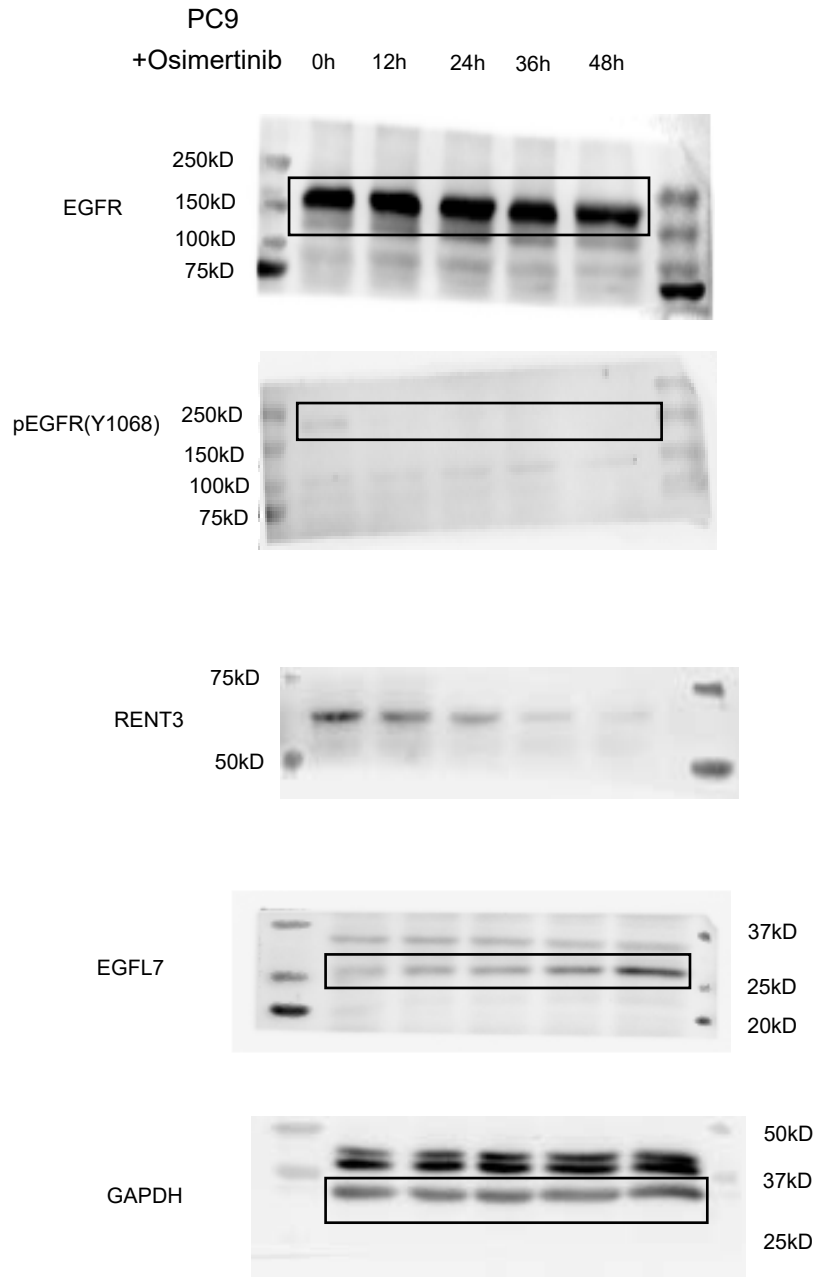

Figure 6A

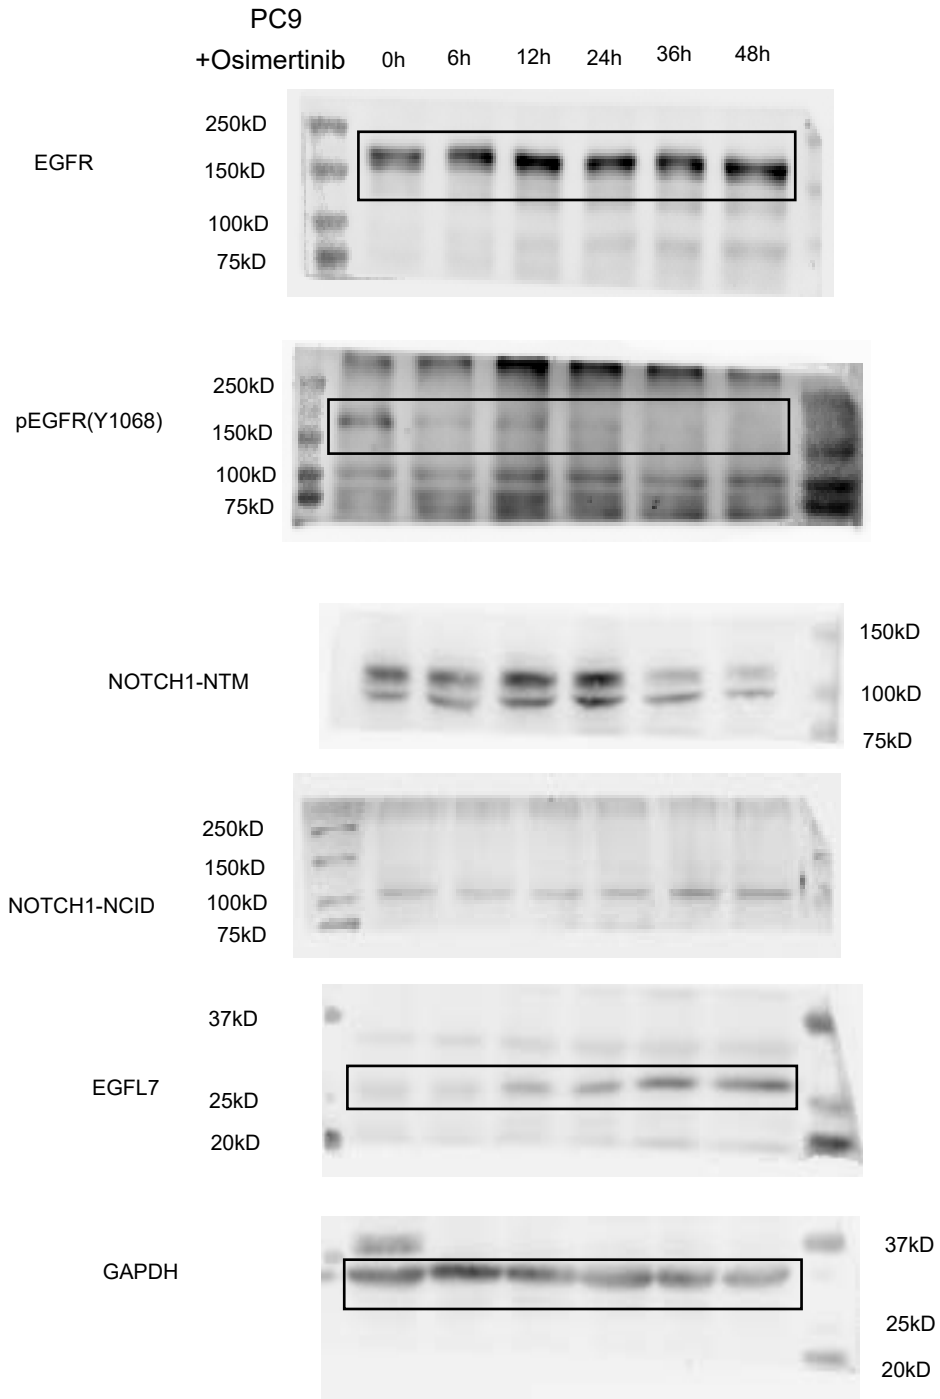

Figure 6B

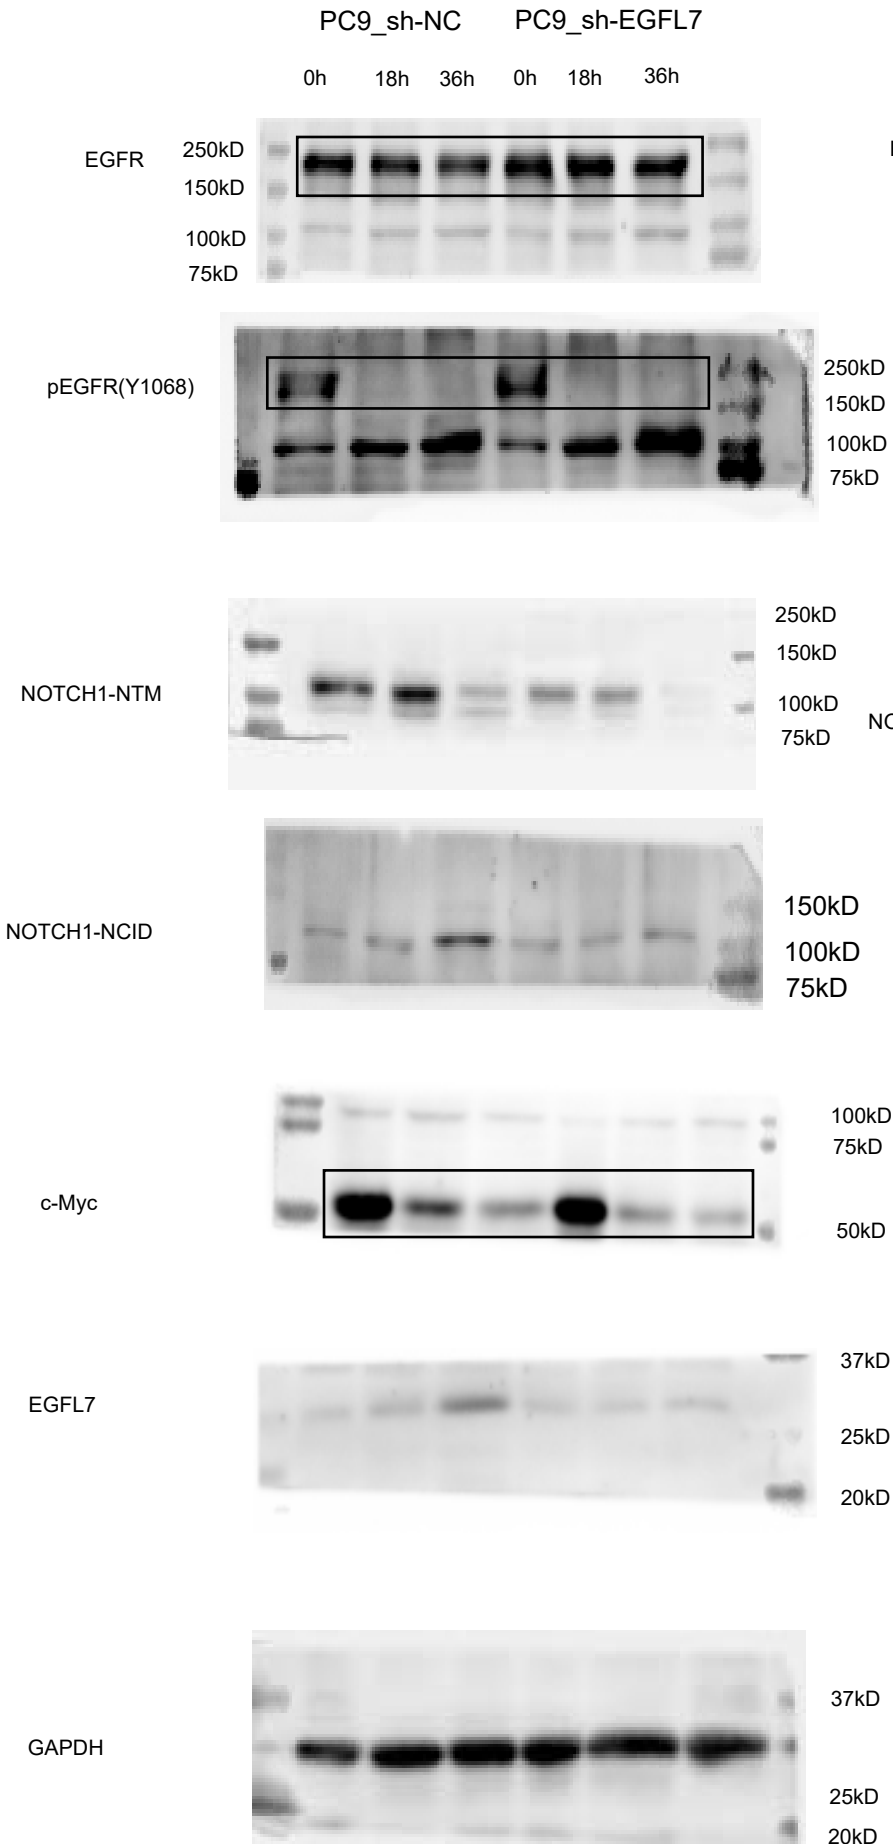

Figure 6D

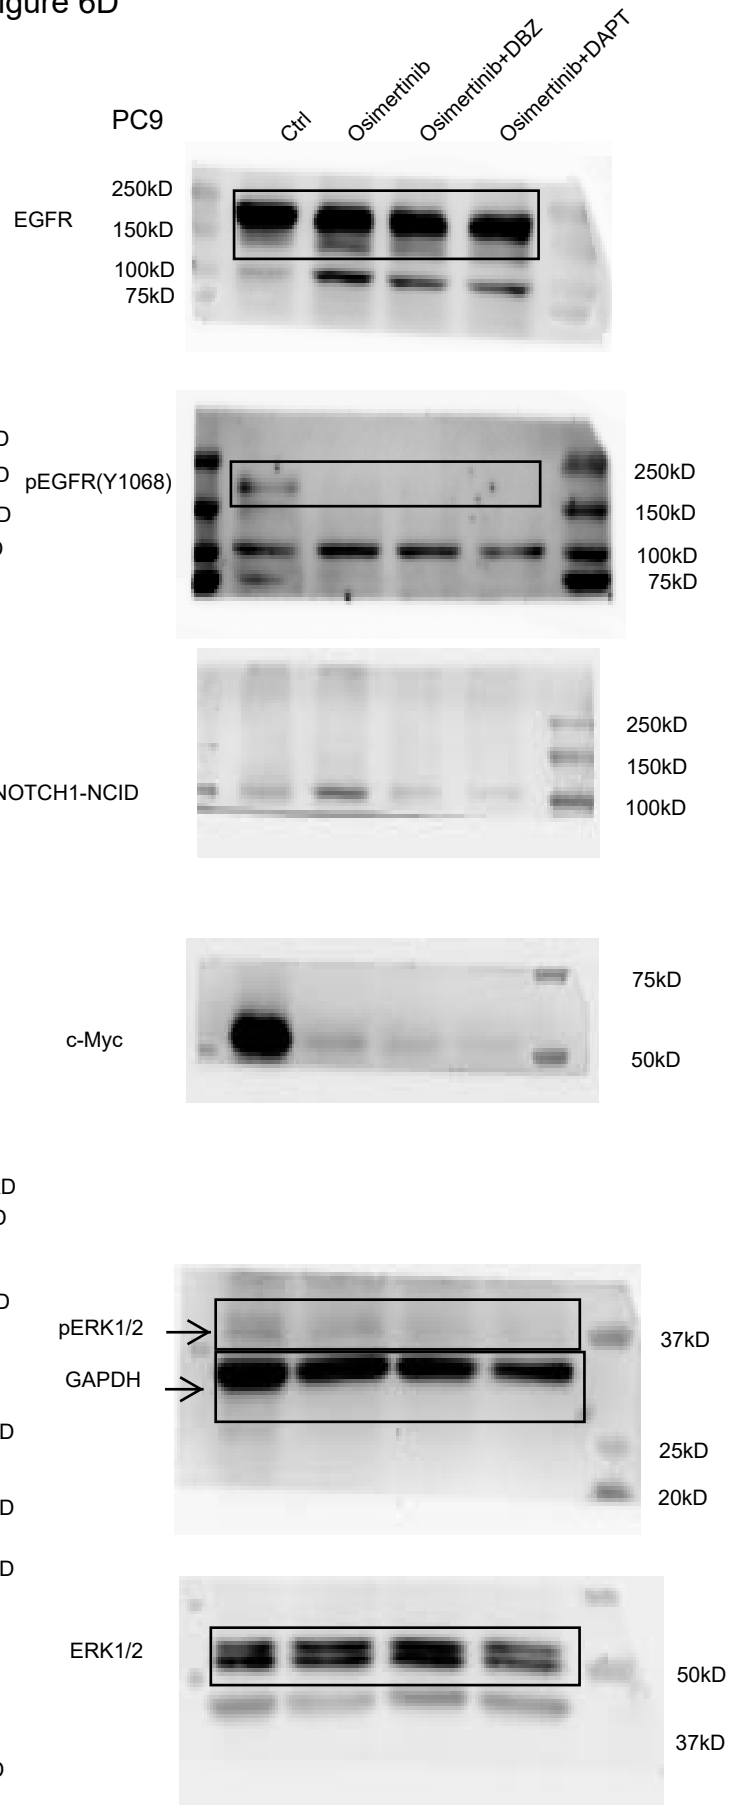

Figure 7A

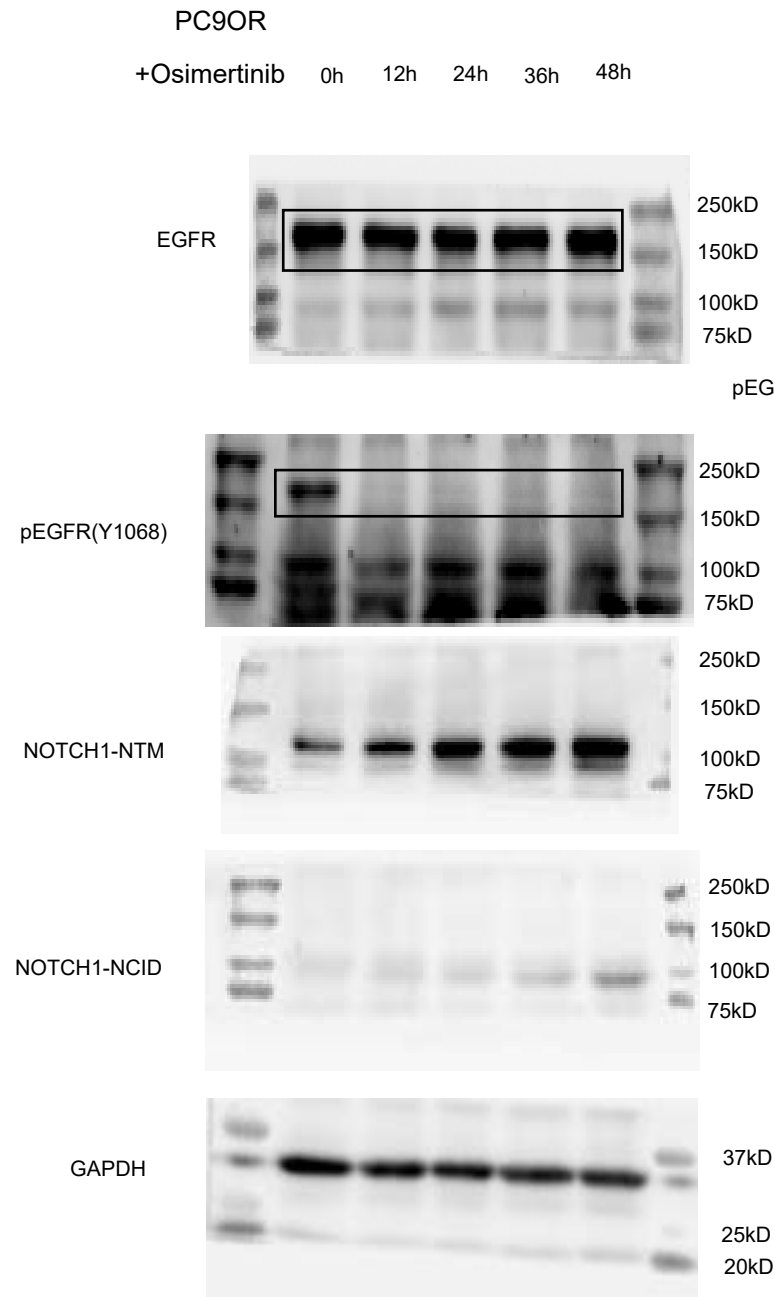

Figure 7B

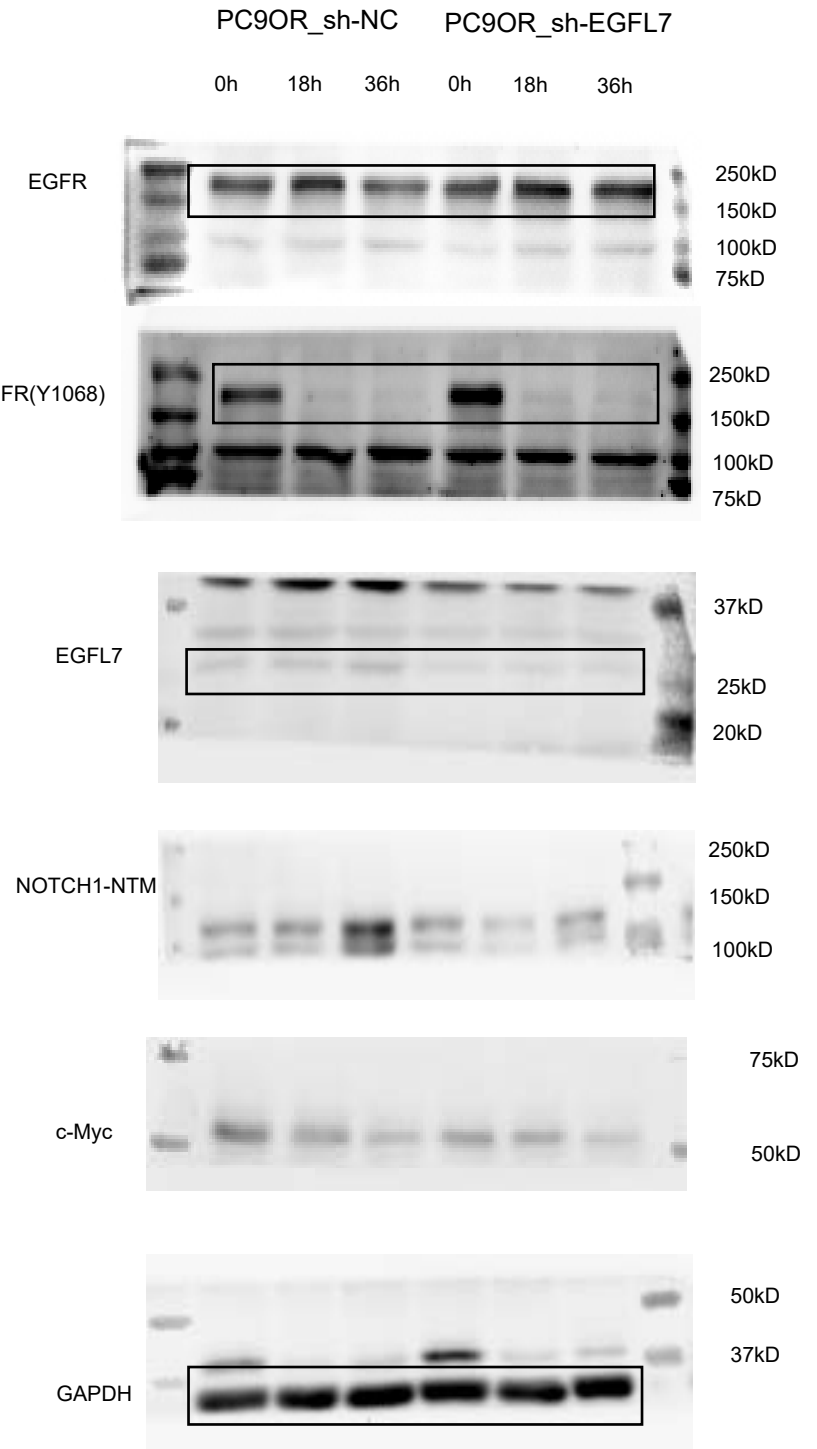

Supplement: 41419_2022_5354_MOESM2_ESM.pdf [file 41419_2022_5354_MOESM2_ESM.pdf]
